# Supplementary material
Source: Springer Nature journal article supplement (https://www.springermedizin.de/resource/supplementary/12958_2009_562_MOESM1_ESM.pdf/9568322)
Supplement: MOESM1 [file 9568322]

**Table 1.** : Alignments of cysteines and disulfide bridges in 8-aa-ring Growth Factor-related molecules

|                               | N-ter | k | loop 1 |    |    |    | ring |    |   | loop 2 |    |    | k  | loop 3 |    |       | ring |    | C-ter |    |          |   |    |   |     |   |     |
|-------------------------------|-------|---|--------|----|----|----|------|----|---|--------|----|----|----|--------|----|-------|------|----|-------|----|----------|---|----|---|-----|---|-----|
|                               |       | 1 | I      | SB |    | 2  |      |    | 3 |        | II | 4  |    | III    |    | 5     | 6    |    | IV    | V  | SB       |   |    |   |     |   |     |
| hBMP <sub>7</sub>             |       | C | 28     |    |    |    | C    | 1  | G | 1      | C  | 31 | C  | C      | 31 |       |      | C  | 1     | C  |          |   |    |   |     |   |     |
| TGFβ <sub>9</sub>             | C     | 7 | C      | C  | 27 |    |      |    | C | 1      | G  | 1  | C  | 28     | C  | C     | 30   |    |       | C  | 1        | C |    |   |     |   |     |
| GDF8 <sub>9</sub>             | C     | 8 | C      | C  | 26 |    |      |    | C | 1      | G  | 1  | C  | 25     | C  | C     | 31   |    |       | C  | 1        | C |    |   |     |   |     |
| hGrem <sub>9</sub>            |       | C | 13     | C  | 9  |    |      |    | C | 1      | G  | 1  | C  | 18     | C  | 2     | C    | 13 | C     | 17 | C        | 1 | C  |   |     |   |     |
| hCer1 <sub>9</sub>            |       | C | 13     | C  | 9  |    |      |    | C | 1      | G  | 1  | C  | 15     | C  | 2     | C    | 13 | C     | 15 | C        | 1 | C  |   |     |   |     |
| hDAND1 <sub>10</sub>          |       | C | 13     | C  | 9  |    |      |    | C | 1      | G  | 1  | C  | 18     | C  | 2     | C    | 13 | C     | 18 | C        | 1 | C  | 2 | C   |   |     |
| hGPA2 <sub>10</sub>           |       | C | 16     | C  | 8  |    |      |    | C | 1      | G  | 1  | C  | 26     | C  | C     | 13   | C  | 15    | C  | 1        | C | 2  | C |     |   |     |
| hGPB5 <sub>10</sub>           |       | C | 13     | C  | 9  |    |      |    | C | 1      | G  | 1  | C  | 19     |    | C     | 14   | C  | 15    | C  | 1        | C | 2  | C | 6   | C |     |
| hGPHα <sub>10</sub>           | C     | 2 | C      | 17 |    |    |      | C  | 1 | G      | C  | C  | 26 | C      | C  | 22    |      |    | C     | 1  | C        | 2 | C  |   |     |   |     |
| hGPHβ <sub>12</sub>           |       | C | 13     | C  | 2  | C  | 7    | C  | 1 | G      | 1  | C  | 18 |        | C  | 14-16 | C    | 15 | C     | 1  | C        | 2 | C  | 6 | C   | 9 | C   |
| <i>hCGβ</i><br><i>number.</i> |       | 9 |        | 23 |    | 26 |      | 34 |   |        |    | 38 |    | 57     |    |       |      |    |       |    |          |   | 93 |   | 100 |   | 110 |
|                               |       |   |        |    |    |    |      |    |   |        |    |    |    |        |    |       |      |    |       |    | seatbelt |   |    |   |     |   |     |

8-membered Ring : C2-1-G-1-C3-C6-1-C5-C2

performing cystine : C1-C4

- red hyphens represent SS bridges
